# Supplementary material for: Anlotinib as a third-line or further treatment for recurrent or metastatic nasopharyngeal carcinoma: a single-arm, phase 2 clinical trial
Source: Springer Nature journal article supplement (doi:10.1186/s12916-023-03140-x), 2023-11-07
Supplement: MOESM1 [file 26274968]

**Anlotinib as a Third-Line or Further Treatment for Recurrent or Metastatic  
Nasopharyngeal Carcinoma: A Single-arm, Phase 2 Clinical Trial**

Yu Fang, Ning Su, Qihua Zou, Yi Cao, Yi Xia, Linqun Tang, Xiaopeng Tian, Panpan  
Liu, Qingqing Cai

**Table of Contents**

|                |   |
|----------------|---|
| Figure S1..... | 1 |
| Figure S2..... | 2 |
| Table S1.....  | 3 |

### Immumotherapy-exposed Patients

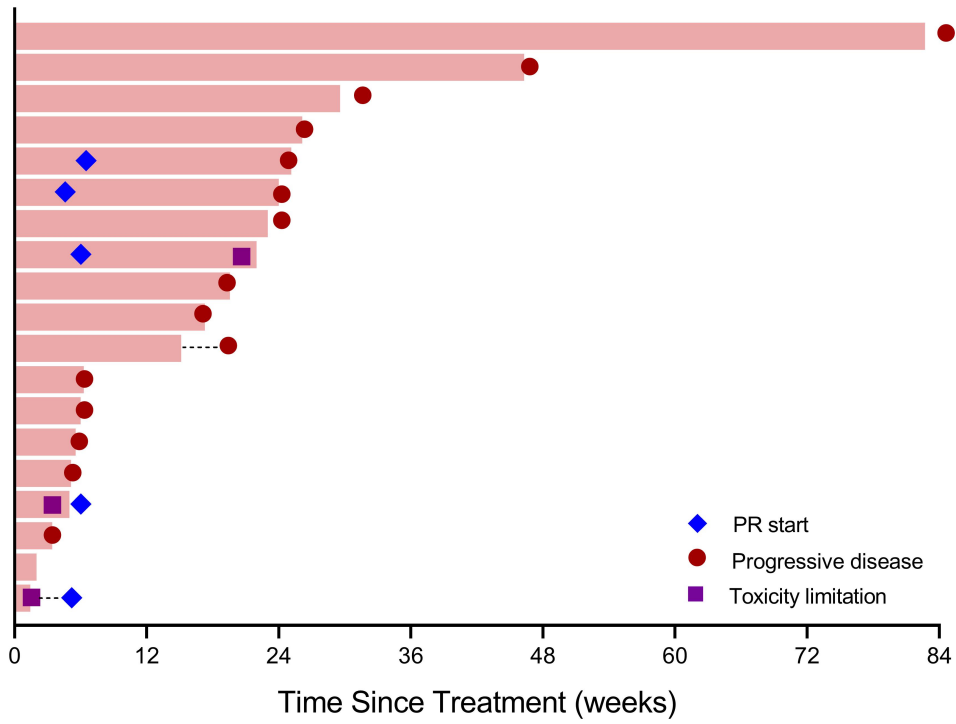

### Immumotherapy-naïve Patients

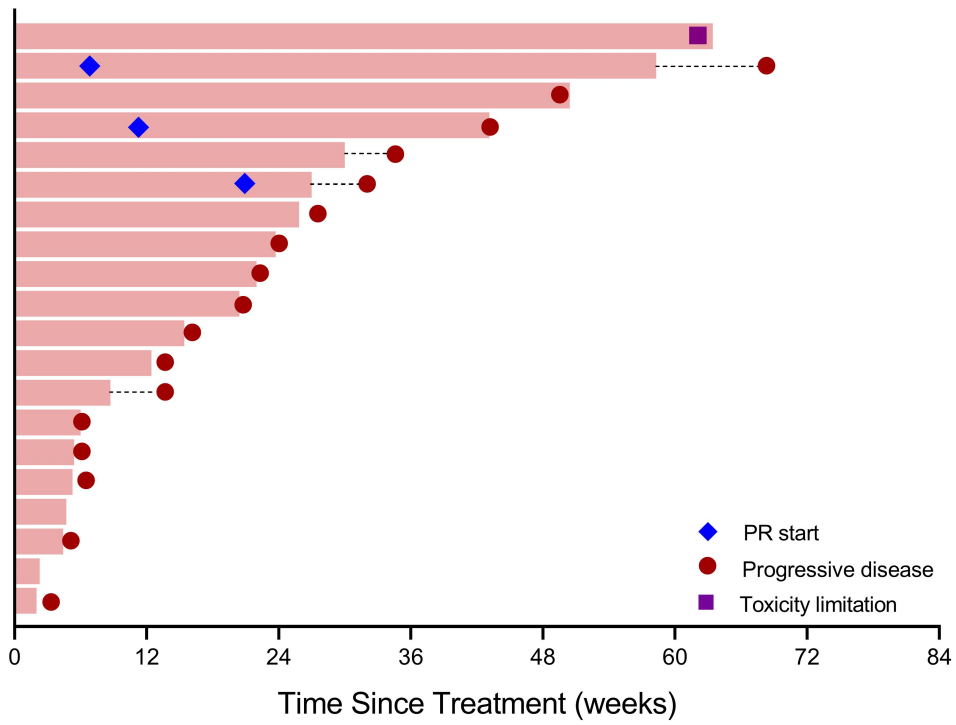

Figure S1. Treatment exposure and response duration of immunotherapy -exposed and immunotherapy-naïve patients.

## A Forest plot analysis of DCR

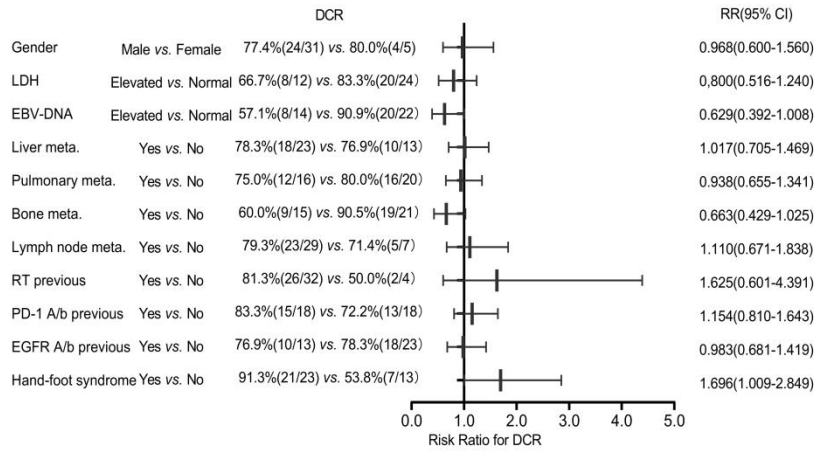

## B Best response and EBV-DNA change

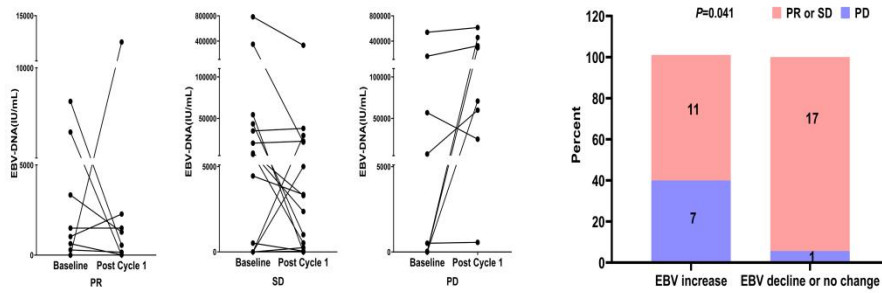

## C Best response and HFS

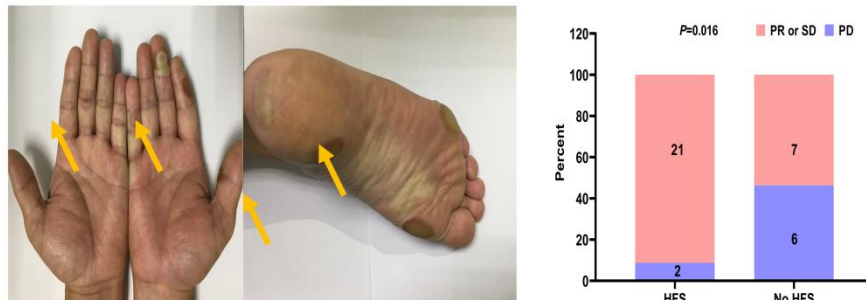

**Figure S2. Subgroup Analysis.** (A) Forest plot analysis of DCR by patient subgroups. (B) Best response and EBV-DNA change. Changes in plasma EBV DNA copy number post cycle 1 from baseline (left panel) and treatment responses of patients (right panel). (C) Hand-foot syndrome in patients treated with anlotinib (left panel) and treatment responses of patients per occurrence of hand-foot syndrome (right panel). Patient responses are colored coded. EBV, Epstein-Barr virus; PD, progressive disease; PR, partial response; SD, stable disease.

**Table S1. Studies of antiangiogenic multikinase inhibitors in recurrent and metastatic nasopharyngeal carcinoma.**

| Agent         | Type                 | Number                                                 | Efficacy                                                                                                                         | Toxicity                                                                                                                                        |
|---------------|----------------------|--------------------------------------------------------|----------------------------------------------------------------------------------------------------------------------------------|-------------------------------------------------------------------------------------------------------------------------------------------------|
| Sorafenib[23] | Prospective phase II | 7 NPC + 20 SCCHN                                       | ORR (3.7%), DCR (37.0%), mPFS (3.4 mos), mOS (4.2 mos).                                                                          | Grade 3 lymphopenia (17%), fatigue (7%), hyponatremia (3%), leucopenia (3%), and lipase elevation (3%). One death for epistaxis.                |
| Sunitinib[11] | Prospective phase II | 13                                                     | ORR (10.0%), DCR (30.0%), mPFS (3.5 mos), mOS (10.5 mos).                                                                        | Grade 3/4 hemorrhage (28.6%), leucopenia (28.6%), fatigue (21.4%), neutropenia (21.4%) and dysphagia (14.3%). Two death for grade 5 hemorrhage. |
| Pazopanib[7]  | Prospective phase II | 33                                                     | ORR (6.1%), DCR (54.5%) at 12 weeks, mPFS (4.4 mos), mOS (10.8 mos).                                                             | Grade 3/4 fatigue (15.2%), hand-foot syndrome (15.2%), anorexia (9.1%), diarrhea (6.1%), and vomiting (6.1%).                                   |
| Axitinib[8]   | Prospective phase II | 40                                                     | ORR (3.7%), DCR (78.4%) at 3 months, mPFS (5.0 mos), mOS (10.4 mos).                                                             | Grade 3/4 hypertension (8%), diarrhea (5%), weight loss (5%), and pain (5%). All hemorrhage were grade 1 -2.                                    |
| Apatinib[24]  | Prospective phase II | 33                                                     | ORR (36.4%), DCR (54.5%) at 5 months, mPFS (5.0 mos), mOS (16.0 mos).                                                            | Grade 3/4 hand-foot syndrome (15.2%), oral ulcer (15.2%), proteinuria (6.1%), leukopenia (6.1%), thrombocytopenia (6.1%) and hemorrhage (3.0%). |
| Lucitanib[9]  | Prospective phase Ib | 10 in the continuous arm,<br>10 in the continuous arm. | ORR (20%), DCR (90%), mPFS (3.73 mos) for the continuous arm;<br>ORR (10%), DCR (60%), mPFS (3.68 mos) for the intermittent arm. | Grade 3/4 hypertension (30% vs 0%), proteinuria (20% vs 0%), increased AST (10% vs 0%), and decreased platelet count (10% vs 0%),               |

|           |                      |    |                                                                          |                                                                                                                      |
|-----------|----------------------|----|--------------------------------------------------------------------------|----------------------------------------------------------------------------------------------------------------------|
| Anlotinib | Prospective phase II | 39 | ORR (20.5%), DCR (71.8%), mPFS (5.7 mos), mOS (NR), 12-month OS (58.3%). | Grade 3/4 hand-foot syndrome (23.7%), oral mucositis (21.0%) and hypertension (7.9%). All hemorrhage were grade 1-2. |
|-----------|----------------------|----|--------------------------------------------------------------------------|----------------------------------------------------------------------------------------------------------------------|

---

AST, aspartate aminotransferase; DCR, disease control rate; mPFS, median progression-free survival; mos, months; mOS, median overall survival; NPC, nasopharyngeal carcinoma; NR, not reached; ORR, objective response rate; SCCHN, squamous cell carcinoma of the head and neck.
